# Supplementary material for: Imidacloprid Impairs Glutamatergic Synaptic Plasticity and Desensitizes Mechanosensitive, Nociceptive, and Photogenic Response of Drosophila melanogaster by Mediating Oxidative Stress, Which Could Be Rescued by Osthole
Source: MDPI journal article supplement (doi:10.3390/ijms231710181), 2022-09-05
Supplement: s1 [file s1]

**Imidacloprid impairs glutamatergic synaptic plasticity and de-sensitizes mechanosensitive, nociceptive, and photogenic re-sponse of *Drosophila melanogaster* by mediating oxidative stress, which could be rescued by osthole**

**Chuan-Hsiu Liu <sup>1,2,a</sup>, Mei-Ying Chen <sup>3,a</sup>, Jack Cheng <sup>3,4</sup>, Tsai-Ni Chuang <sup>3</sup>, Hsin-Ping Liu <sup>3,\*</sup> and Wei-Yong Lin <sup>3,4,5\*</sup>**

<sup>1</sup> Graduate Institute of Chinese Medicine, China Medical University, Taichung 40402, Taiwan

<sup>2</sup> School of Chinese Medicine, China Medical University, Taichung 40402, Taiwan

<sup>3</sup> Graduate Institute of Integrated Medicine, China Medical University, Taichung 40402, Taiwan

<sup>4</sup> Department of Medical Research, China Medical University Hospital, Taichung 40402, Taiwan

<sup>5</sup> Graduate Institute of Acupuncture Science, China Medical University, Taichung 40402, Taiwan

<sup>a</sup> C.-H. Liu and M.-Y. Chen contributed equally to this work.

\* Correspondence: hpliu@mail.cmu.edu.tw (HPL) & linwy@mail.cmu.edu.tw (WYL)

**Supplementary Table S1.** Primers used in this study.

| Gene Name | 5' primer                 | 3' primer                |
|-----------|---------------------------|--------------------------|
| norpA     | TCTTTGAGCCTGTCACGTTG      | TCTTTGCTCTTGCCCTTGAT     |
| ninaC     | GCACAGCCAGTTTGTGAAGA      | GCCTTGGTCAGTTGATTGGT     |
| trp-F:    | GATTACGGCATTACCGAGGA      | CAACTCCCTGCGACTTCTTC     |
| trpI      | GAACAGCGGAATGGATGTTT      | TGGACTCCACCTTGATCTCC     |
| TrpY      | TGTGGTGCTGCTCAACCTAC      | GTTTGGAGCGAGCAAACCTC     |
| Itpr-F    | TTGCGGTTTCCTTCAGCTACT     | CGTCTCCGATACCAGGTTGT     |
| rdgC      | TCTGCTGGACACGGATGTTA      | CAATCGCAGTTTTCGAACTCA    |
| inaC      | ATTTCATGGGATCGTTCTCG      | AATGTTACCCCTCCACTTGC     |
| inaD      | GCAGACCACCAACAACAATG      | GTGGTATTCCGCTTCTGCAT     |
| inaE      | ATTCCACGGACTTCGATGAG      | TGCCTTTACGGTTCGATCTC     |
| Gprk1     | GCCAACATACTGCTCGATGA      | CATGAGTTCCCACTGAAGCA     |
| Galphaq   | AGGACAAGCGTGGGTACATC      | CTCGAACGTGGTAACGGTCT     |
| Gβ76C     | TATCGCTGGCTTATCGCTTT      | TCGTGACCGAAGAACATCTG     |
| Gγ30A     | CGCTGGCCGTTATCTAAATC      | GGCCCATGGATTGTTCTTC      |
| Pkc53E    | AAGTGCAACCGCCATTTAAG      | GTGGGCGTCAAGTCTGTTTT     |
| Cam       | GACACCGATAGCGAAGAGGA      | GTCATCACGTGACGCAACTC     |
| nompc     | AACTCTGCGGGTGTTCAAGT      | ACTTAGGAGCAAACCGACCA     |
| nan       | CCGAGCGGTTGAAGAACTTT      | CTGCACCTCCTTCATCTCCT     |
| TRPA1     | CGGCATCTATGTGGTCATGT      | AAGGACAAGTGGTTCGGTTG     |
| pain      | TTTCCTGCTCTTCGTGATCTT     | TCCGCCTGAGCCTTAATAACT    |
| Arr2      | GGAGTGATTGTGGTGGAACC      | CGACCATAGCGATAGGTGGT     |
| nrv2      | AAGACGCAGCCAGAAAAGC       | GCAGGTAGTTGACAGCACCA     |
| TotA      | CCAAAATGAATTCTTCAACTGCT   | GAATAGCCCATGCATAGAGGA    |
| TotC      | AATGAATGCCTCCATTTCTCTACTA | CTCGTCAGAATAGCCCAAGC     |
| TotM      | CAAGCCTGCACTATGAATCCT     | CATCTTCGTTCTCAGCATTTACC  |
| TotX      | CCTCAAGGAGGATCATTTGG      | AGACGAAATATACCGGGTTC     |
| TRPM      | GATTCTGGAGGGACTGATCG      | GAAGGCTTCGAAGGTGACAG     |
| GstD1     | TCGCGAGTTTCACAACAGAA      | TGAGCAGCTTCTTGTTACAGC    |
| GstD2     | CGGACATTGCCATCCTGT        | TGCTGAAGTCGAACTCACTAACTT |
| GstE1     | CATGTCGAGCTCTGGAATTGT     | GTTTGACGGTCCTCACACAG     |
| Sod1      | GTCGACGAGAATCGTCACCT      | GGAGTCGGTGATGTTGACCT     |
| Sod3      | TCAGCATGGGTGCTCACTAT      | TAATGCCCCTGGAGTTGG       |
| Cat       | TGACTACAAAACTCCCAAACG     | TTGATTCCAATGGGTGCTC      |
| Ho        | GCCAATGCCTGCCCAGGTTA      | ACGCGCCTTAGTTTGGCCTT     |
| Irc       | GCCCAGCTGCCTTAACTATG      | GCTGCGGTGAAACCATAGAG     |

**Supplementary Table S1 (continued).** Primers used in this study.

| <b>Gene Name</b> | <b>5' primer</b>        | <b>3' primer</b>       |
|------------------|-------------------------|------------------------|
| Keap1            | CAAGGAGTCGGAGATGTCG     | GTAGAGGATGCGTGACATGG   |
| Cnc              | TTAACCAGACGGATGGCTTT    | TGTCAACCATGCGACAGAAG   |
| Fdh              | CAGTGGTGTGTTGGGACATGAG  | GGGGATGTAGAGAGCGATGA   |
| Cyp6w1           | AAAAACCTCTTCTTTGCACGA   | TGTCCTGCAAGTTCTTTCCA   |
| Cyp6a2           | GCGCAACGAGATCCAAAC      | GGGCACCAGTGTGTAGAGC    |
| Cyp6a8           | CAAGATAAGGTTTCGGGCTGA   | CAATGGTGTACAGTCGCAGAGT |
| Cyp6g1           | GATGTACACCCTTATGCAGGAGA | TTCTTCTCTCCACGCCTCTG   |
| Cyp12d1-d        | GGTCCCGTTCGATCTTCAA     | GGTCTTGTGCTCCTCCGTTA   |
| Cyp18a1          | TCCACCATTCTGGAGTCGAT    | ACCCATTGAGTTCCACATCC   |
| Mdr65            | TCAGCTGCCATTCCAAGATA    | GATGACCCGCGATCAGAG     |
| Jafrac1          | CCCACCAAGTCCAAGGAGTA    | TTCAGCGAACAGATAGCCTCT  |
